# Supplementary material for: Delayed tooth movement in Runx2+/− mice associated with mTORC2 in stretch-induced bone formation
Source: PubMed Central journal article supplement — Bone Rep. 2020 May 27;12:100285. doi: 10.1016/j.bonr.2020.100285 (PMC7264061; doi:10.1016/j.bonr.2020.100285), 2020-05-27
Supplement: mmc1.pdf [file mmc1.pdf]

## Supplemental Data

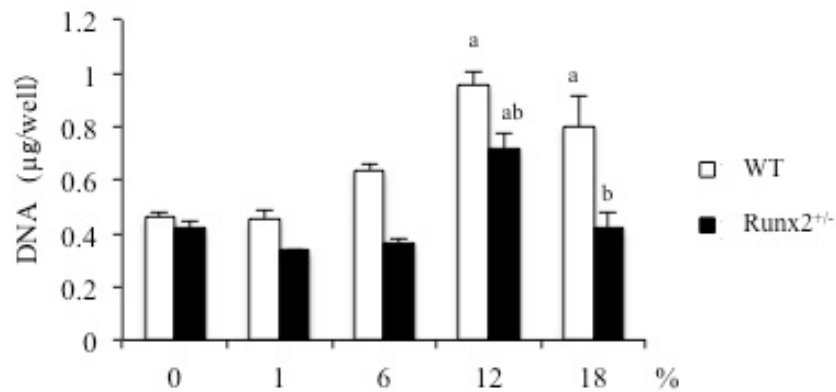

**Fig. S1. Effect of stretch value on proliferation of wild-type and Runx2<sup>+/-</sup> BMSCs.** At 24 hours after 0, 1, 6, 12 and 18 % stretch, the proliferation of wild-type and Runx2<sup>+/-</sup> BMSCs were evaluated. Values are averages  $\pm$  SD (n = 3). a, significantly different between corresponding unstretched and stretched wild-type and Runx2<sup>+/-</sup> BMSCs. b, significantly different between stretched wild-type and Runx2<sup>+/-</sup> BMSCs.

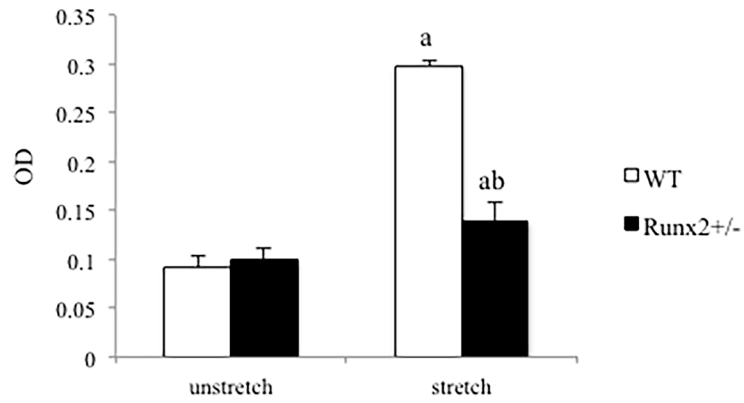

**Fig. S2. Effect of stretch on the proliferation in wild-type and Runx2<sup>+/-</sup> BMSCs by using CCK8.** At 24 hours after 12% stretch, the proliferation of wild-type and Runx2<sup>+/-</sup> BMSCs were detected by CCK8. Values are averages  $\pm$  SD (n = 3). a, significantly different between corresponding unstretched and stretched wild-type and Runx2<sup>+/-</sup> BMSCs. b, significantly different between stretched wild-type and Runx2<sup>+/-</sup> BMSCs.

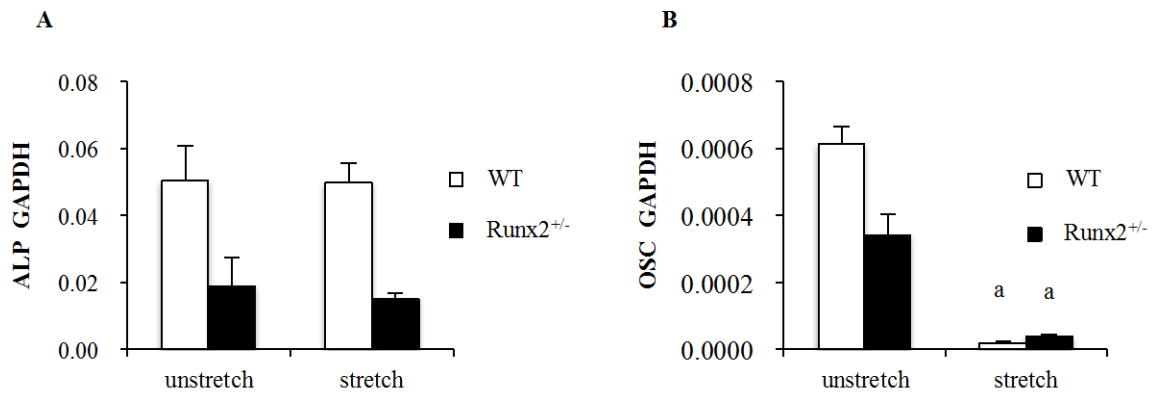

**Fig. S3. ALP and Runx2 mRNA expression in wild-type and Runx2<sup>+/-</sup> BMSCs after stretch.** ALP (A) and OSC (B) mRNA expression in BMSCs stretched for 6 hours. Values are averages  $\pm$  SD (n = 3). a, significantly different between corresponding unstretched and stretched wild-type and Runx2<sup>+/-</sup> BMSCs.

**Table. S1. Specific primers used for real-time RT-PCR.**

| Gene  |         | Primer sequence            | Size (bp) | Gene Bank Accession number |
|-------|---------|----------------------------|-----------|----------------------------|
| OSC   | forward | 5'-AAGCAGGAGGGCAATAAGGT-3' | 152       | X04142                     |
|       | reverse | 5'-TAGGCGGTCTTCAAGCCATA-3' |           |                            |
| ALP   | forward | 5'-AACCCAGAGACAAGCATTCC-3' | 151       | X13409                     |
|       | reverse | 5'-GAGAGVGAAGGGTCAGTCAG-3' |           |                            |
| Runx2 | forward | 5'-CCCAGCCACCTTTACCTACA-3' | 150       | NM009820                   |
|       | reverse | 5'-TATGGAGTGCTGCTGGTCTG-3' |           |                            |
| GAPDH | forward | 5'-TGCACCACCAACTGCTTAG-3'  | 177       | NM008084                   |
|       | reverse | 5'-GGATGCAGGGATGATGTTC-3'  |           |                            |
